# Supplementary material for: Evaluation of anidulafungin in the treatment of intra-abdominal candidiasis: a pooled analysis of patient-level data from 5 prospective studies
Source: PubMed Central journal article supplement (PMC6778589; doi:10.1007/s10096-019-03617-9), 2019-07-06
Supplement: 10096_2019_3617_MOESM2_ESM.pdf [file 10096_2019_3617_MOESM2_ESM.pdf]

# **Evaluation of anidulafungin in the treatment of intra-abdominal candidiasis: a pooled analysis of patient-level data from 5 prospective studies**

*European Journal of Clinical Microbiology & Infectious Diseases*

Gabriele Sganga<sup>1</sup> • Minggui Wang<sup>2</sup> • M. Rita Capparella<sup>3</sup> • Margaret Tawadrous<sup>4</sup> •

Jean L. Yan<sup>5</sup> • Jalal A. Aram<sup>4</sup> • Philippe Montravers<sup>6</sup>

<sup>1</sup>*Emergency Surgery, Fondazione Policlinico Universitario A. Gemelli IRCCS – Università Cattolica del Sacro Cuore, Roma, Italy;* <sup>2</sup>*Fudan University, Shanghai, China;* <sup>3</sup>*Pfizer PIO, Paris, France;* <sup>4</sup>*Pfizer Inc, Groton, CT, USA;* <sup>5</sup>*Pfizer Inc, Collegeville, PA, USA;* <sup>6</sup>*Paris Diderot Sorbonne Cite University and Bichat-Claude Bernard University Hospital, Paris, France.*

**Correspondence:** Dr. Gabriele Sganga, Emergency Surgery, Fondazione Policlinico Universitario A. Gemelli IRCCS – Università Cattolica del Sacro Cuore, Roma, Italy, Largo A. Gemelli 8, 00168 Roma, Italy.

Tel: 063015 4437/6211/4545 ([gabriele.sganga@policlinicogemelli.it](mailto:gabriele.sganga@policlinicogemelli.it))

**Online Resource 1** *In vitro* MIC data for anidulafungin, and susceptibility to anidulafungin, fluconazole and voriconazole, by *Candida* species

| <b>Species (n)</b>              | <b>Anidulafungin<br/>MIC<sub>50</sub> (mg/L)</b> | <b>Anidulafungin<br/>MIC<sub>90</sub> (mg/L)</b> | <b>Susceptible to<br/>anidulafungin (%)</b> | <b>Susceptible to<br/>fluconazole (%)</b> | <b>Susceptible to<br/>voriconazole (%)</b> |
|---------------------------------|--------------------------------------------------|--------------------------------------------------|---------------------------------------------|-------------------------------------------|--------------------------------------------|
| All <i>Candida</i> species (57) | ≤0.015                                           | 0.03                                             | 100.0                                       | 84.2                                      | 94.7                                       |
| <i>C. albicans</i> (37)         | ≤0.015                                           | 0.03                                             | 100.0                                       | 91.9                                      | 91.9                                       |
| <i>C. glabrata</i> (15)         | 0.03                                             | 0.125                                            | 100.0                                       | 66.7                                      | 100.0                                      |
| <i>C. krusei</i> (1)            | 0.03                                             | 0.03                                             | 100.0                                       | 0.0                                       | 100.0                                      |
| <i>C. tropicalis</i> (4)        | ≤0.015                                           | 0.03                                             | 100.0                                       | 100.0                                     | 100.0                                      |

*MIC*, minimum inhibitory concentration
