# Supplementary material for: Evaluation of anidulafungin in the treatment of intra-abdominal candidiasis: a pooled analysis of patient-level data from 5 prospective studies
Source: PubMed Central journal article supplement (PMC6778589; doi:10.1007/s10096-019-03617-9), 2019-07-06
Supplement: 10096_2019_3617_MOESM4_ESM.pdf [file 10096_2019_3617_MOESM4_ESM.pdf]

# **Evaluation of anidulafungin in the treatment of intra-abdominal candidiasis: a pooled analysis of patient-level data from 5 prospective studies**

*European Journal of Clinical Microbiology & Infectious Diseases*

Gabriele Sganga<sup>1</sup> • Minggui Wang<sup>2</sup> • M. Rita Capparella<sup>3</sup> • Margaret Tawadrous<sup>4</sup> •

Jean L. Yan<sup>5</sup> • Jalal A. Aram<sup>4</sup> • Philippe Montravers<sup>6</sup>

<sup>1</sup>*Emergency Surgery, Fondazione Policlinico Universitario A. Gemelli IRCCS – Università Cattolica del Sacro Cuore, Roma, Italy;* <sup>2</sup>*Fudan University, Shanghai, China;* <sup>3</sup>*Pfizer **PFE** **PIQ**, Paris, France;* <sup>4</sup>*Pfizer Inc, Groton, CT, USA;* <sup>5</sup>*Pfizer Inc, Collegetown, PA, USA;* <sup>6</sup>*Paris Diderot Sorbonne Cite University and Bichat-Claude Bernard University Hospital, Paris, France.*

**Correspondence:** Dr. Gabriele Sganga, Emergency Surgery, Fondazione Policlinico Universitario A. Gemelli IRCCS – Università Cattolica del Sacro Cuore, Roma, Italy, Largo A. Gemelli 8, 00168 Roma, Italy.

Tel: 063015 4437/6211/4545 ([gabriele.sganga@policlinicogemelli.it](mailto:gabriele.sganga@policlinicogemelli.it))

**Online Resource 1** *In vitro* MIC data for anidulafungin, and susceptibility to anidulafungin, fluconazole and voriconazole, by *Candida* species

| Species ( <i>n</i> )            | Anidulafungin<br>MIC <sub>50</sub> (mg/L) | Anidulafungin<br>MIC <sub>90</sub> (mg/L) | Susceptible to<br>anidulafungin (%) | Susceptible to<br>fluconazole (%) | Susceptible to<br>voriconazole (%) |
|---------------------------------|-------------------------------------------|-------------------------------------------|-------------------------------------|-----------------------------------|------------------------------------|
| All <i>Candida</i> species (57) | ≤0.015                                    | 0.03                                      | 100.0                               | 84.2                              | 94.7                               |
| <i>C. albicans</i> (37)         | ≤0.015                                    | 0.03                                      | 100.0                               | 91.9                              | 91.9                               |
| <i>C. glabrata</i> (15)         | 0.03                                      | 0.125                                     | 100.0                               | 66.7                              | 100.0                              |
| <i>C. krusei</i> (1)            | 0.03                                      | 0.03                                      | 100.0                               | 0.0                               | 100.0                              |
| <i>C. tropicalis</i> (4)        | ≤0.015                                    | 0.03                                      | 100.0                               | 100.0                             | 100.0                              |

*MIC*, minimum inhibitory concentration
